# Supplementary material
Source: PubMed Central journal article supplement (PMC3677512)
Supplement: NIHMS476254-supplement-Supplementary_Table_1.pdf [file NIHMS476254-supplement-Supplementary_Table_1.pdf]

| Clone group | Accession number | Identity                                                                                                                                                                                                                            |
|-------------|------------------|-------------------------------------------------------------------------------------------------------------------------------------------------------------------------------------------------------------------------------------|
| A           | NM_009460        | Mus musculus SMT3 suppressor of mif two 3 homolog 1 (yeast)(Sumo1), mRNA                                                                                                                                                            |
| B           | BC043945         | Mus musculus complement component 1, q subcomponent, gamma polypeptide                                                                                                                                                              |
| C           | BC054426         | Mus musculus fatty acid binding protein 4, adipocyte                                                                                                                                                                                |
| D           | NM_017399        | Mus musculus fatty acid binding protein 1, liver (Fabp1)                                                                                                                                                                            |
| F           | NM_030054        | Mus musculus mitochondrial solute carrier protein (Mscp)                                                                                                                                                                            |
| G           | BC086645         | Mus musculus RNA-binding region (RNP1, RRM) containing 2                                                                                                                                                                            |
| H           | NM_010706        | Mus musculus lectin, galactose binding, soluble 4 (Lgals4)                                                                                                                                                                          |
| I           | NM_008473        | Mus musculus keratin complex 2, basic, gene 1 (Krt2-1)                                                                                                                                                                              |
| J           | NM_011045        | Mus musculus proliferating cell nuclear antigen (Pcna)                                                                                                                                                                              |
| K           | BC057983         | Mus musculus pregnancy zone protein                                                                                                                                                                                                 |
| L           | BC086645         | Mus musculus RNA-binding region (RNP1, RRM) containing 2                                                                                                                                                                            |
| M           | BC053923         | Mus musculus bone morphogenetic protein 1                                                                                                                                                                                           |
| N           | BC027240         | Mus musculus DnaJ (Hsp40) homolog, subfamily A, member 3                                                                                                                                                                            |
| O           | BC020407         | Mus musculus similar to glyceraldehyde-3-phosphate dehydrogenase                                                                                                                                                                    |
| P           | NM_025975        | Mus musculus t-complex-associated-testis-expressed 1-like (Tcte1)                                                                                                                                                                   |
| R           | AC087114         | Mus musculus Strain C57BL6/J Chromosome 10 RP23-309M23                                                                                                                                                                              |
| S           | BC060276         | Mus musculus RIKEN cDNA 1110055E19 gene                                                                                                                                                                                             |
| T           | AK032815         | Mus musculus 12 days embryo male wolffian duct includes surrounding region cDNA, RIKEN full-length enriched library, clone:6720457F16 product:RNA-BINDING PROTEIN FUS (PIGPEN PROTEIN) homolog [Mus musculus], full insert sequence |
| U           | NM_024189        | Mus musculus YY1 associated factor 2 (Yaf2)                                                                                                                                                                                         |
| Y           | NM_008495        | Mus musculus lectin, galactose binding, soluble 1 (Lgals1)                                                                                                                                                                          |

Supplementary Table 1. Identity of unique clones isolated from the screen of the mouse 17d embryonic cDNA library. Clone groups (indicated by letter) were identified by sequencing and BLAST analysis. Accession numbers and annotated identities of the most closely matched sequences for each clone group are indicated.
